# Supplementary material
Source: PubMed Central journal article supplement (PMC6501514)
Supplement: Supplementary_Figure_1.pdf [file Supplementary_Figure_1.pdf]

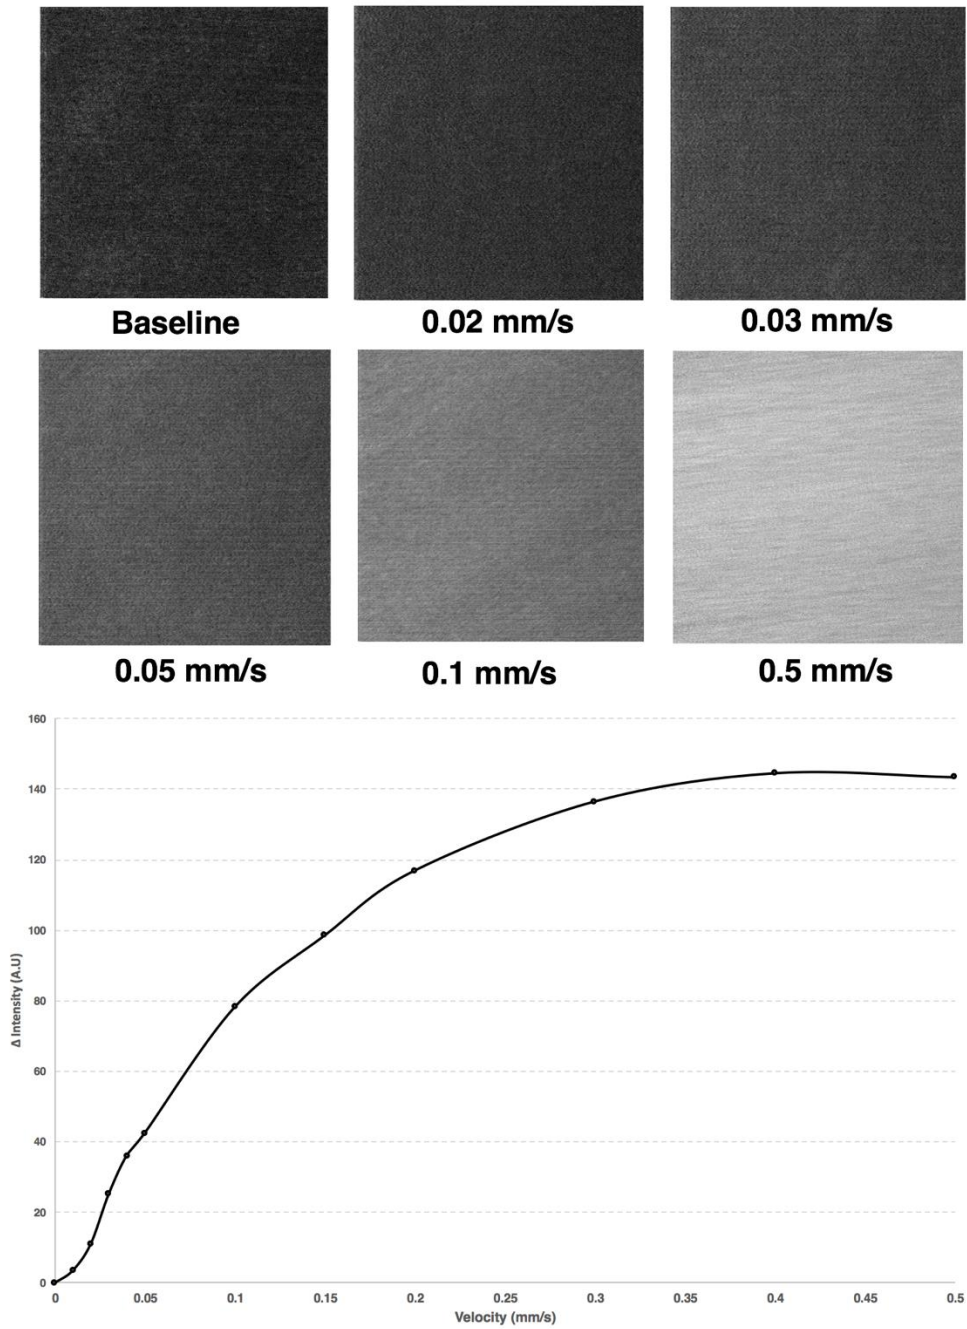

**Supplementary Figure 1:** OCT angiogram signals of the phantom surface during baseline (no motion) and various horizontal velocities. Increase in signal intensity is evident with higher velocities. The signal difference between moving and steady states (in arbitrary units) are plotted for the tested velocities. No visual difference was observed below 0.02 mm/s.
